# Supplementary material for: Surface modification effects on the tensile properties of functionalised graphene oxide epoxy films
Source: Royal Society of Chemistry journal article supplement (doi:10.1039/c8ra00252e), 2018-01-01
Supplement: c8ra00252e1.pdf [file c8ra00252e1.pdf]

## Electronic Supplementary Information (ESI)

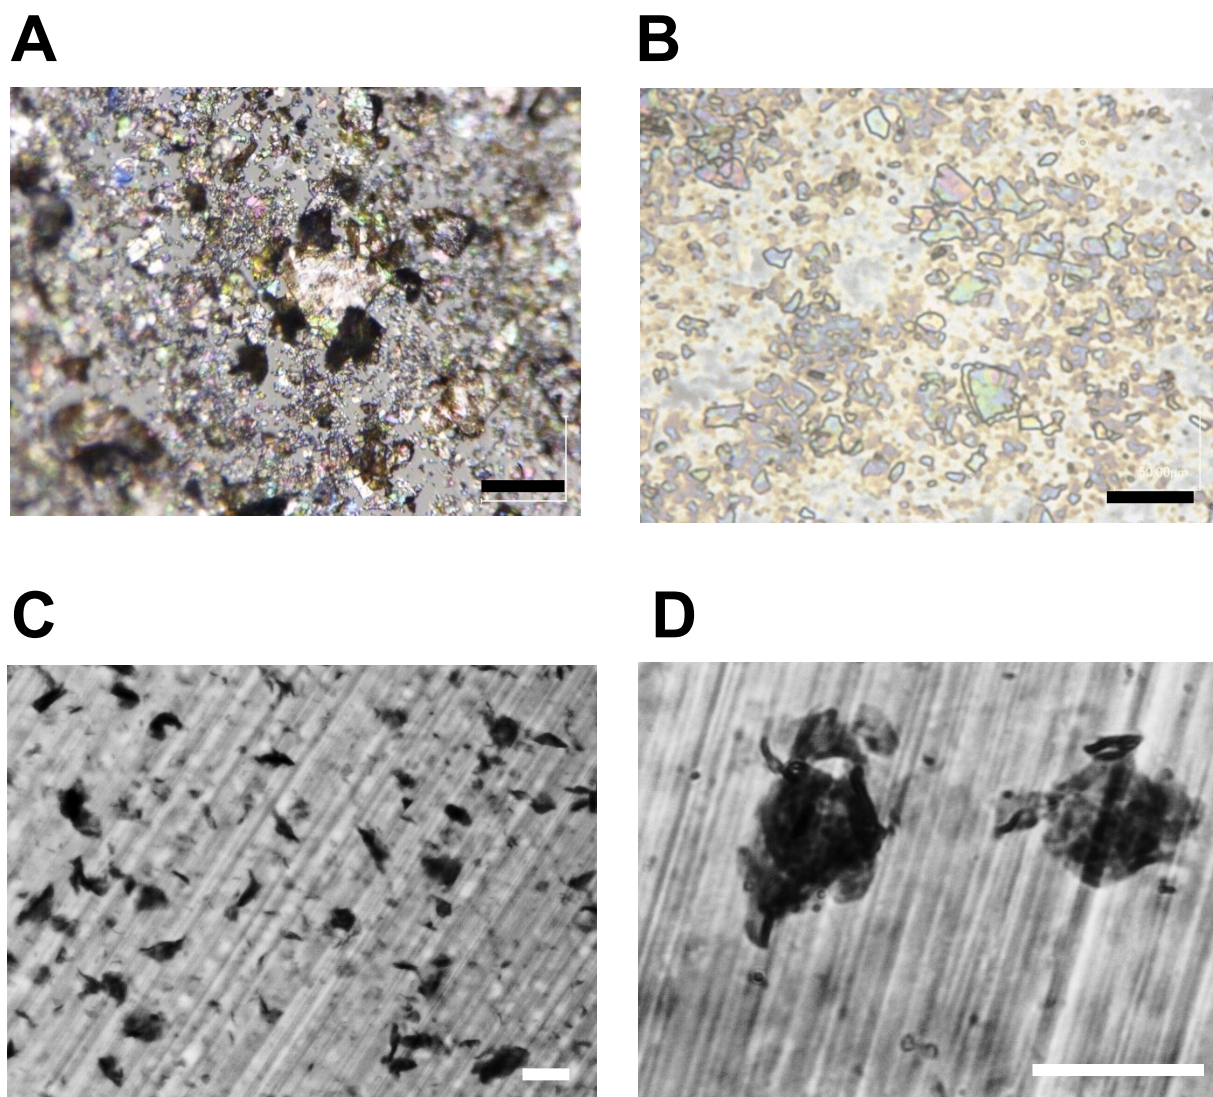

**SFig. 1** Optical microscopic images of (A) 3hB-GO; (B) GO prepared according to the Hummers method with a pre-oxidation process using  $P_2O_5$  and (C) GO fillers of (B) dispersed in the epoxy film. (D) corresponds to the magnified image of (C). The GO concentration in the epoxy composite (as shown in (C) and (D)) is 0.05wt%. The bars in the bottom right corners correspond to 50  $\mu\text{m}$ .
